# Supplementary material for: Novel flurbiprofen clubbed oxadiazole derivatives as potential urease inhibitors and their molecular docking study
Source: Royal Society of Chemistry journal article supplement (doi:10.1039/d3ra03841f), 2023-01-01
Supplement: d3ra03841f1.pdf [file d3ra03841f1.pdf]

### Representative 1H and 13CNMR Spectra

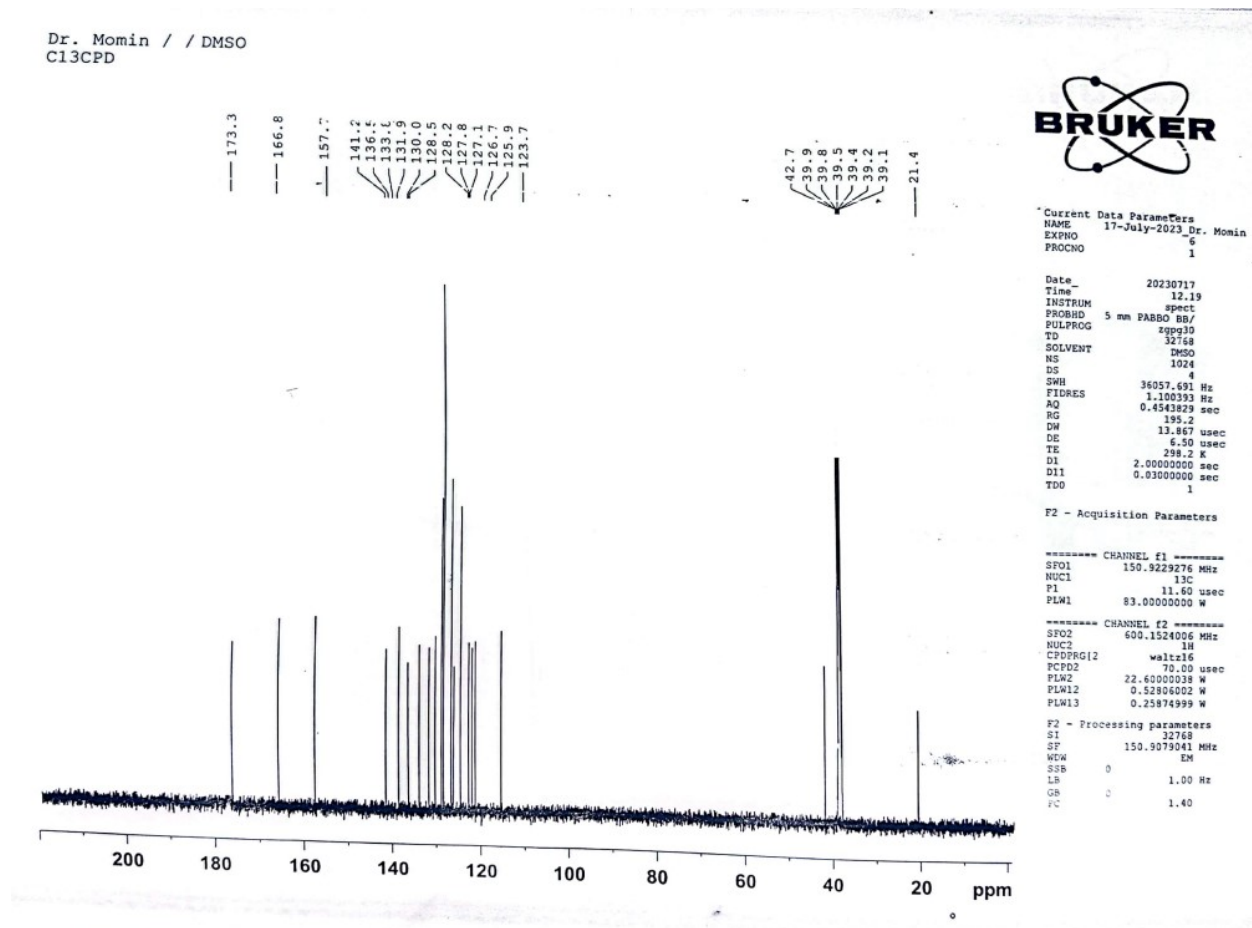

Figure-S1: <sup>13</sup>CNMR of Compound 5

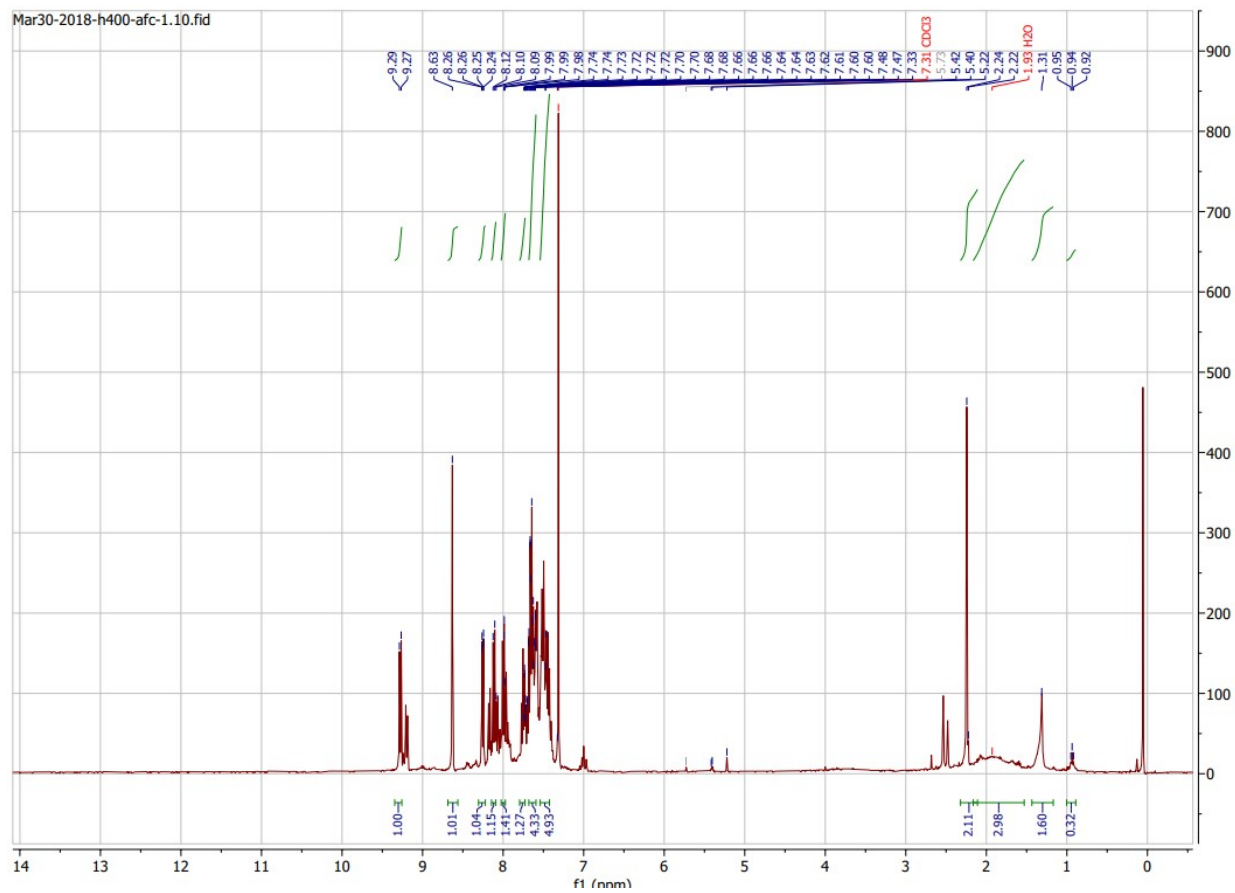

Figure-S2: <sup>1</sup>H NMR of Compound 5

Dr. Momin / / DMSO  
C13CPD

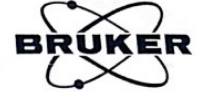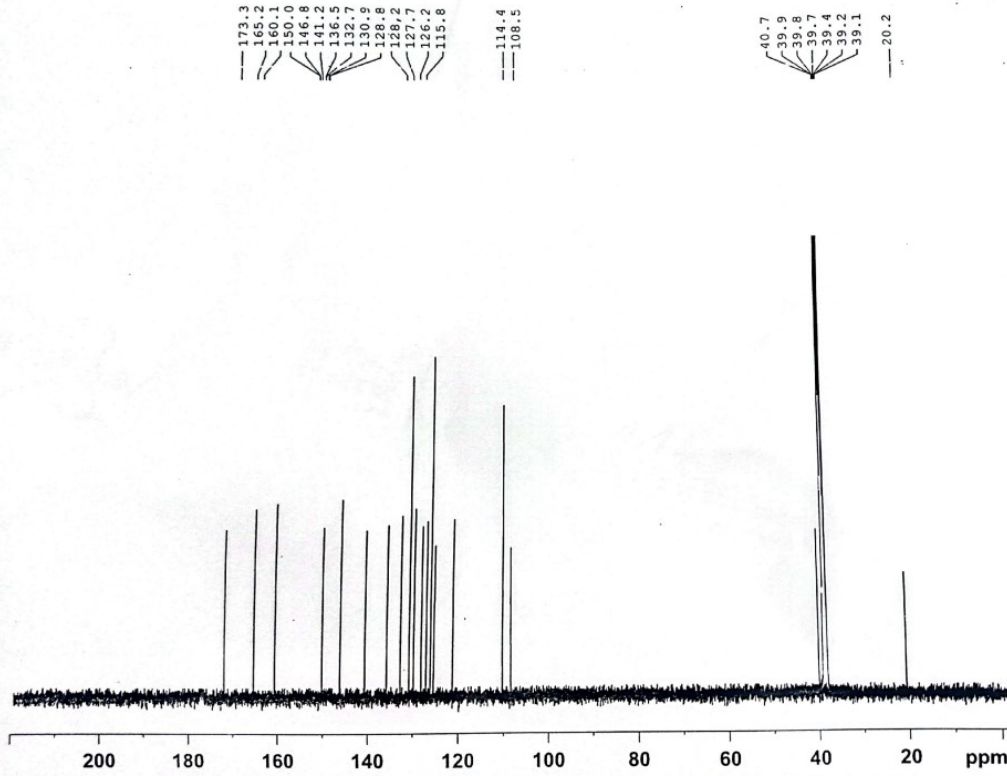

Current Data Parameters  
NAME 27-July-2023, Dr. Momin  
EXPHO 6  
PROCNO 1

Date 20220717  
Time 12.30  
INSTRUM spect  
PROBHD 5 mm PABBO BB/  
PULPROG zgpg30  
TD 32768  
SOLVENT DMSO  
NS 1024  
DS 4  
SWH 36057.691 Hz  
FIDRES 1.100393 Hz  
AQ 0.4543829 sec  
RG 195.2  
DW 13.867 usec  
DE 6.50 usec  
TE 298.2 K  
D1 2.0000000 sec  
D11 0.0300000 sec  
TDO 1

F2 - Acquisition Parameters

----- CHANNEL f1 -----  
SFO1 150.9229276 MHz  
NUC1 13C  
P1 11.60 usec  
PLW1 83.0000000 W

----- CHANNEL f2 -----  
SFO2 600.1524006 MHz  
NUC2 1H  
CPDPRG12 waltz16  
PCPD2 70.00 usec  
PLM2 22.60000038 W  
PLW12 0.52806002 W  
PLW13 0.25874999 W

F2 - Processing parameters  
SI 32768  
SF 150.9079041 MHz  
WDW EM  
SSB 0  
LB 1.00 Hz  
GB 0  
PC 1.40

Figure-S3: <sup>13</sup>CNMR of Compound 6

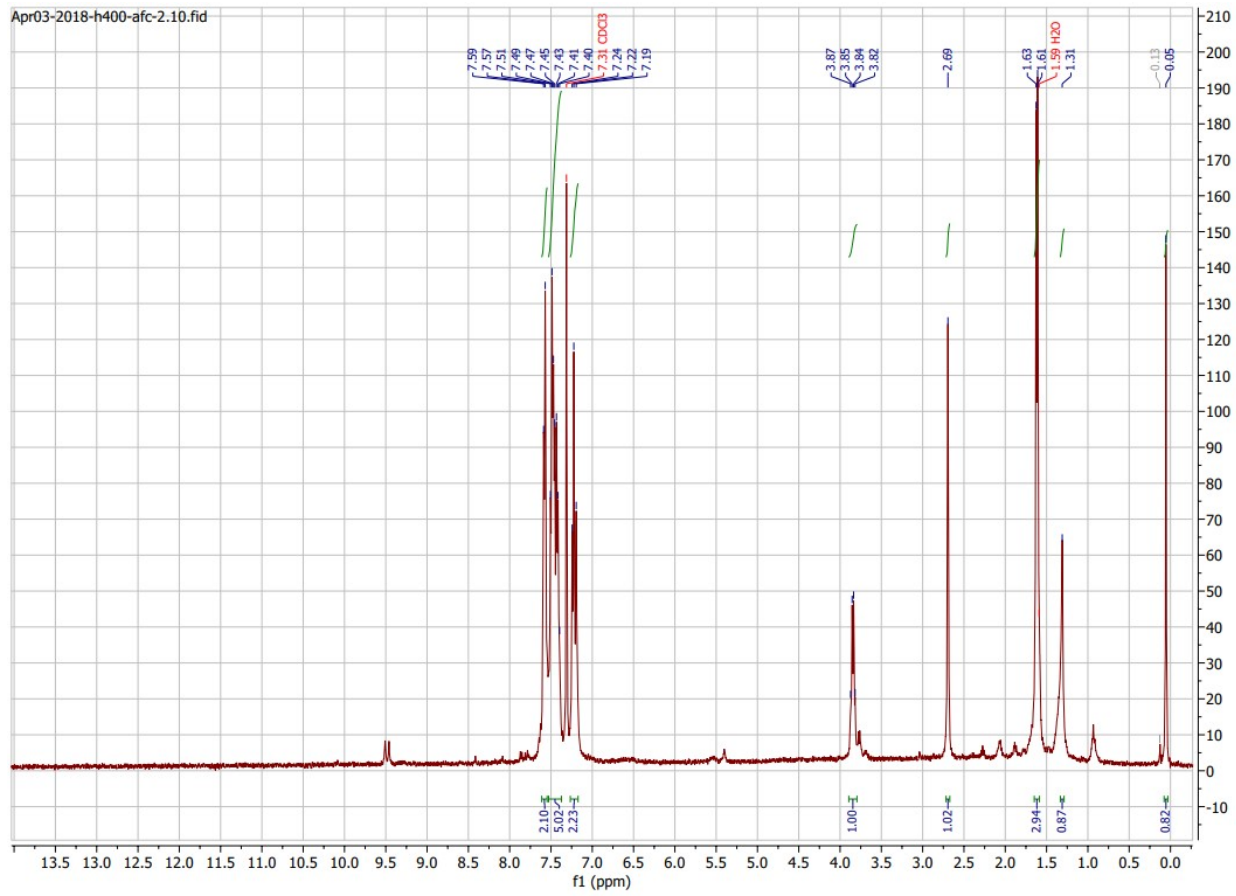

Figure-S4: <sup>1</sup>H NMR of Compound 6

Dr. Momin / / DMSO  
C13CPD

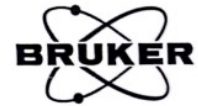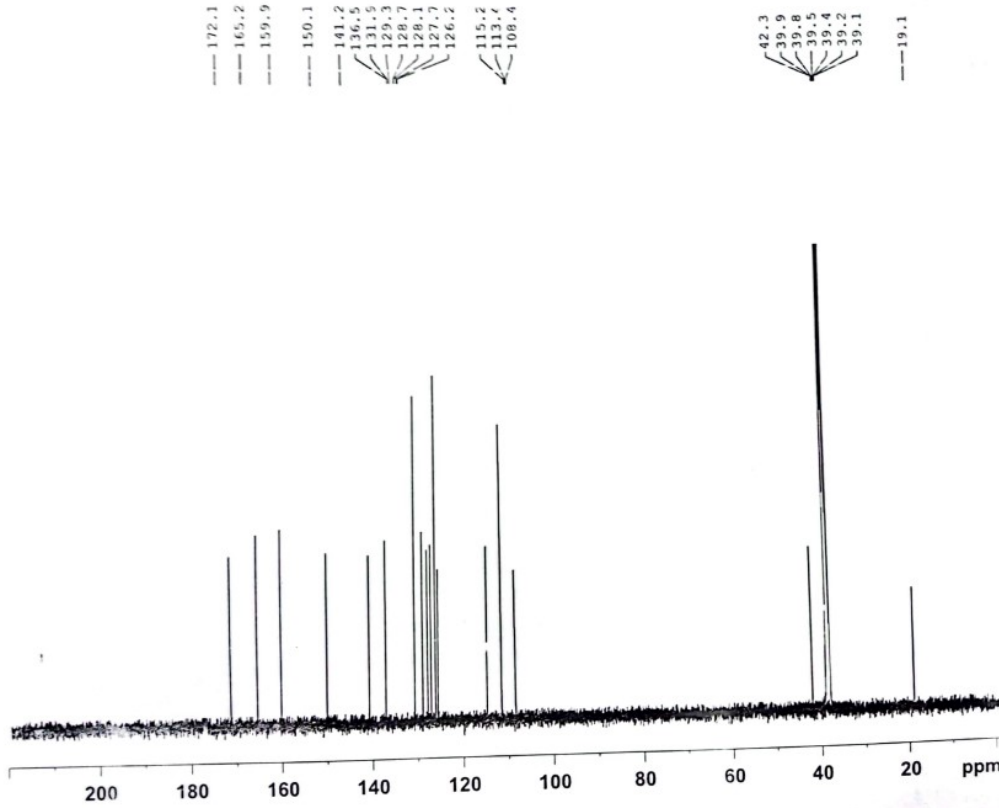

Current Data Parameters  
NAME 17-July-2023\_Dr. Momin  
EXPNO 6  
PROCNO 1  
Date\_ 20230717  
Time 12.40  
INSTRUM spect  
PROBHD 5 mm PABBO BB/  
PULPROG zgpg30  
TD 32768  
SOLVENT DMSO  
NS 1024  
DS 2  
SWH 36057.694 Hz  
FIDRES 1.100393 Hz  
AQ 0.4543629 sec  
RG 195.2  
CW 13.967 usec  
DE 6.50 usec  
TE 298.2 K  
D1 2.0000000 sec  
d11 0.03000000 sec  
TDO 1

F2 - Acquisition Parameters  
----- CHANNEL f1 -----  
SFO1 150.9229276 MHz  
NUC1 13C  
P1 11.40 usec  
PLW1 83.0000000 W  
----- Channel f2 -----  
SFO2 600.1524006 MHz  
NUC2 1H  
CPOPRG(2) waltz16  
PCPD2 70.00 usec  
PLW2 22.6000000 W  
PLW12 0.52806002 W  
PLW13 0.25874999 W  
F2 - Processing parameters  
SI 32768  
SF 150.9079041 MHz  
WDW EM  
SSB 0  
LB 1.00 Hz  
GB 0  
PC 1.40

Figure-S5: <sup>13</sup>CNMR of Compound 7

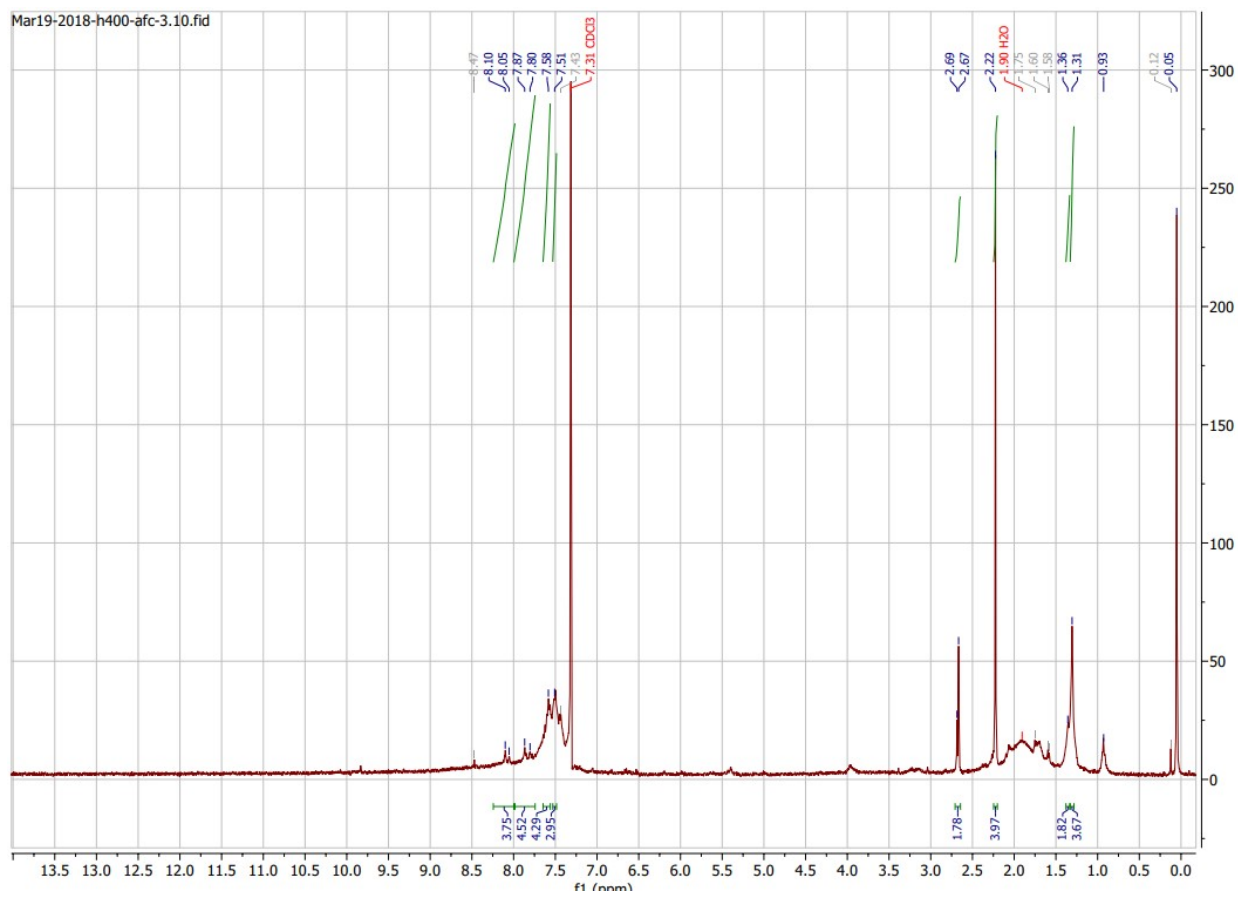

Figure-S6:  $^1\text{H}$ NMR of Compound 7

Dr. Momin / / DMSO  
C13CPD

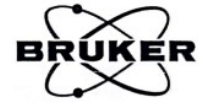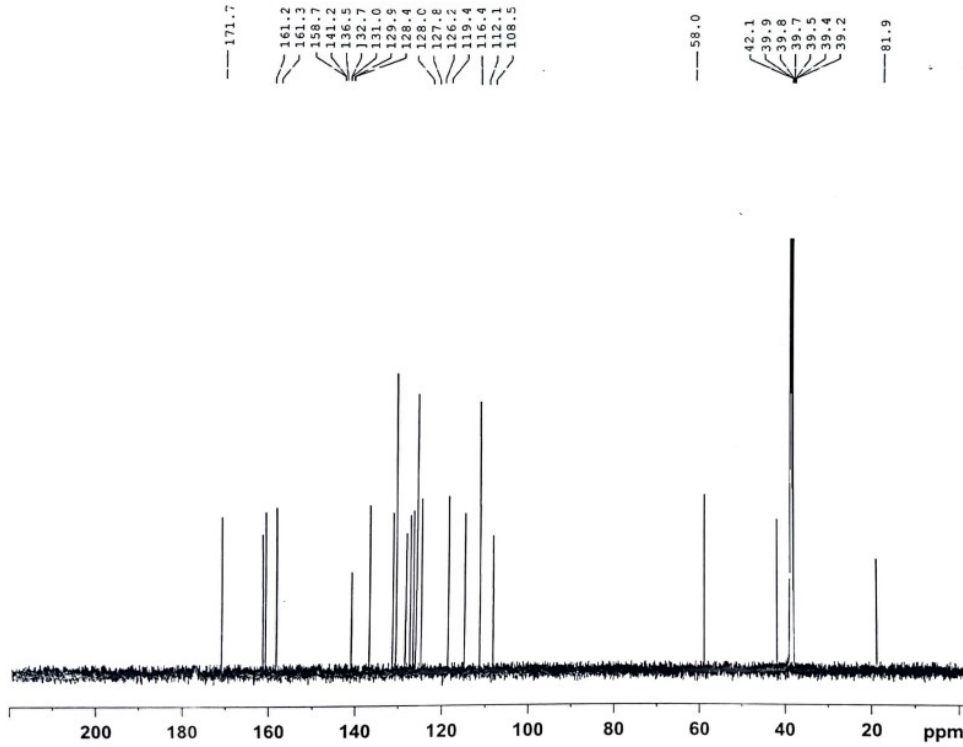

Current Data Parameters  
NAME 17-July-2023\_Dr. Momin  
EXPNO 6  
PROCNO 1

Date\_ 20230717  
Time\_ 12.47  
INSTRUM spect  
PROBHD 5 mm PABBO BB/  
PULPROG zgpg30  
TD 32768  
SOLVENT DMSO  
NS 1024  
DS 4  
SWH 36057.691 Hz  
FIDRES 1.100393 Hz  
AQ 0.4543829 sec  
RG 195.2  
DW 13.867 usec  
DE 6.50 usec  
TE 298.2 K  
D1 2.0000000 sec  
D11 0.0300000 sec  
TD0 1

F2 - Acquisition Parameters

===== CHANNEL f1 =====  
SFO1 150.9229276 MHz  
NUC1 13C  
P1 11.60 usec  
PLW1 83.0000000 W

===== CHANNEL f2 =====  
SFO2 600.1524006 MHz  
NUC2 1H  
CPDPRG(2) waltz16  
PCPD2 70.00 usec  
PLW2 22.60000039 W  
PLW12 0.52806002 W  
PLW13 0.25874999 W

F2 - Processing parameters  
SI 32768  
SF 150.9079943 MHz  
KDK EM  
SBB 0  
LB 1.00 Hz  
GB 0  
PC 1.40

Figure-S7: <sup>13</sup>CNMR of Compound 9

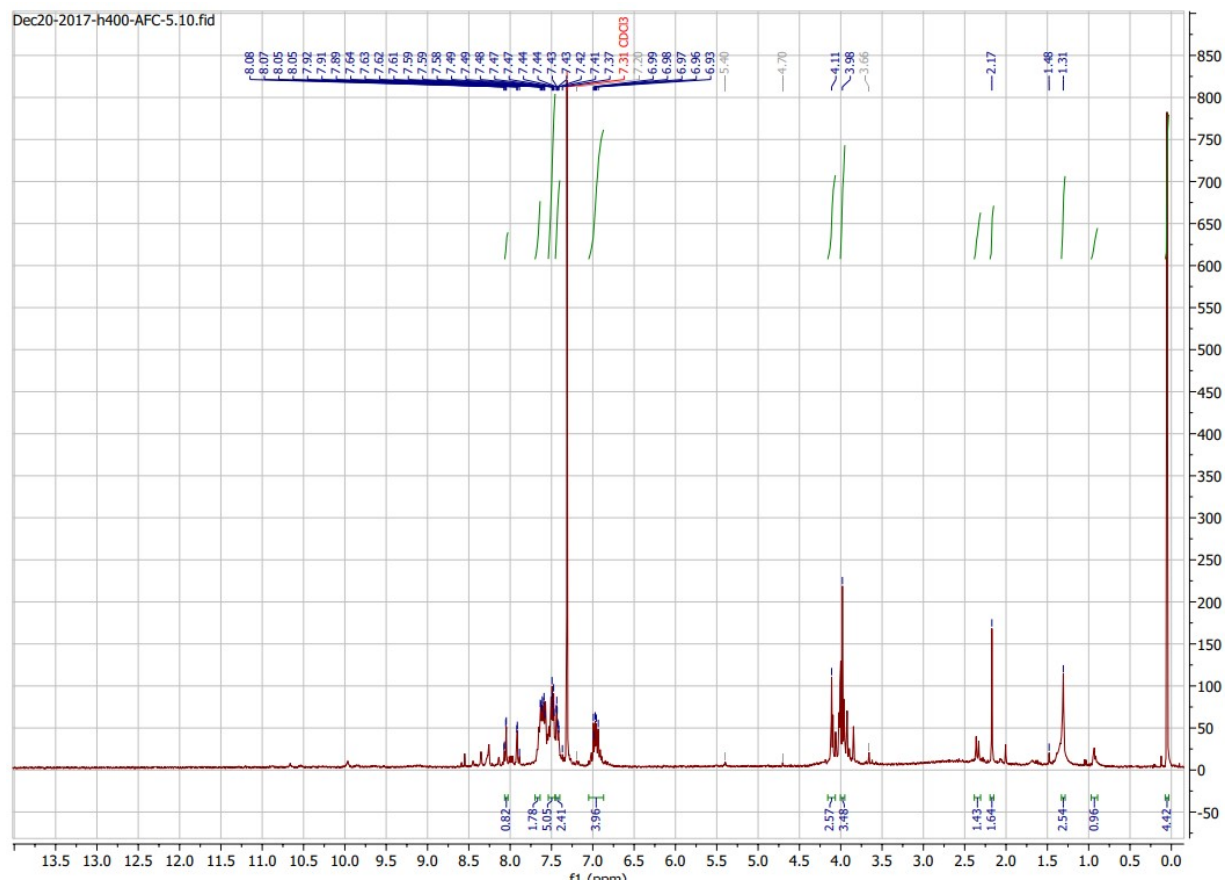

Figure-S8: <sup>1</sup>H NMR of Compound 9



Dr. Momin / / DMSO  
C13CPD

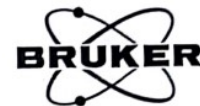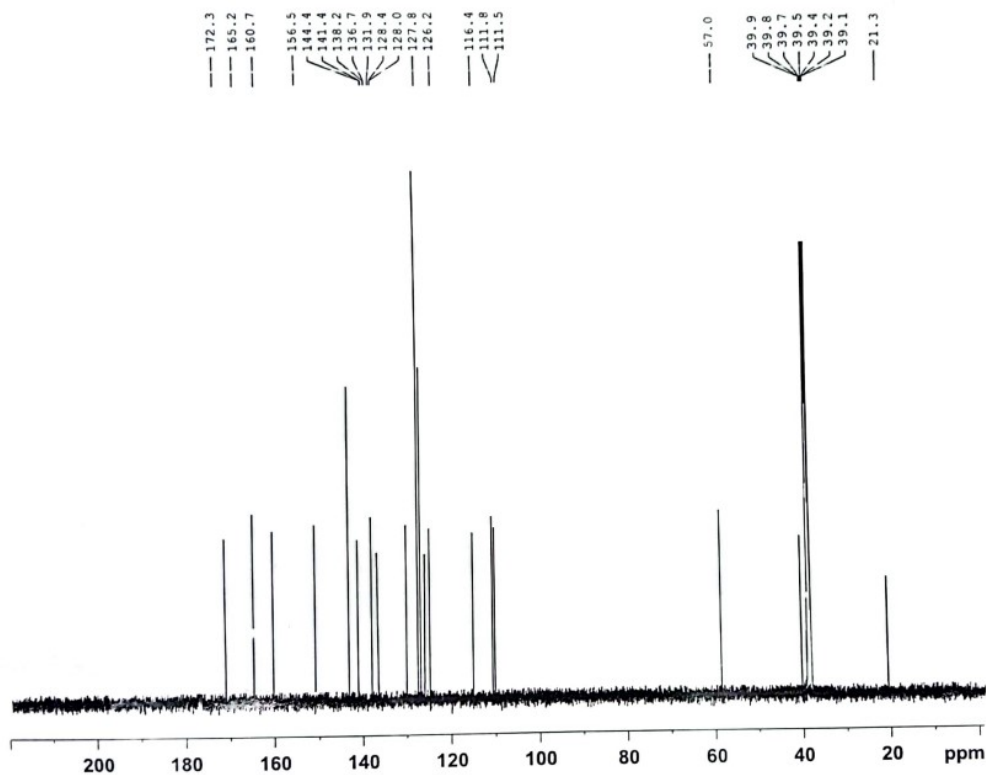

Current Data Parameters  
NAME 17-July-2023\_Dr. Momin  
EXPRO 6  
PFOCHO 1

Date\_ 20230717  
Time 12.55  
INSTRUM spect  
PROBHD 5 mm PABBO BB/  
PULPROG zgpg30  
TD 32768  
SOLVENT DMSO  
NS 1024  
DS 4  
SWH 36057.631 Hz  
FIDRES 1.100393 Hz  
AQ 0.4543829 sec  
RG 195.2  
DM 13.867 usec  
DE 6.50 usec  
TE 298.2 K  
D1 2.0000000 sec  
D11 0.0300000 sec  
TD0 1

F2 - Acquisition Parameters

----- CHANNEL f1 -----  
SFO1 150.9229276 MHz  
NUC1 13C  
P1 11.60 usec  
PLW1 83.00000000 W

----- CHANNEL f2 -----  
SFO2 600.1524006 MHz  
NUC2 1H  
CDDPRG12 waltz16  
PCPD2 70.00 usec  
PLW2 22.60000038 W  
PLW12 0.52806002 W  
PLW13 0.25874999 W

F2 - Processing parameters  
SI 32768  
SF 150.9079041 MHz  
WDW EM  
SSB 0  
LB 1.00 Hz  
GB 0  
PC 1.40

Figure-S9: <sup>13</sup>CNMR of Compound 10

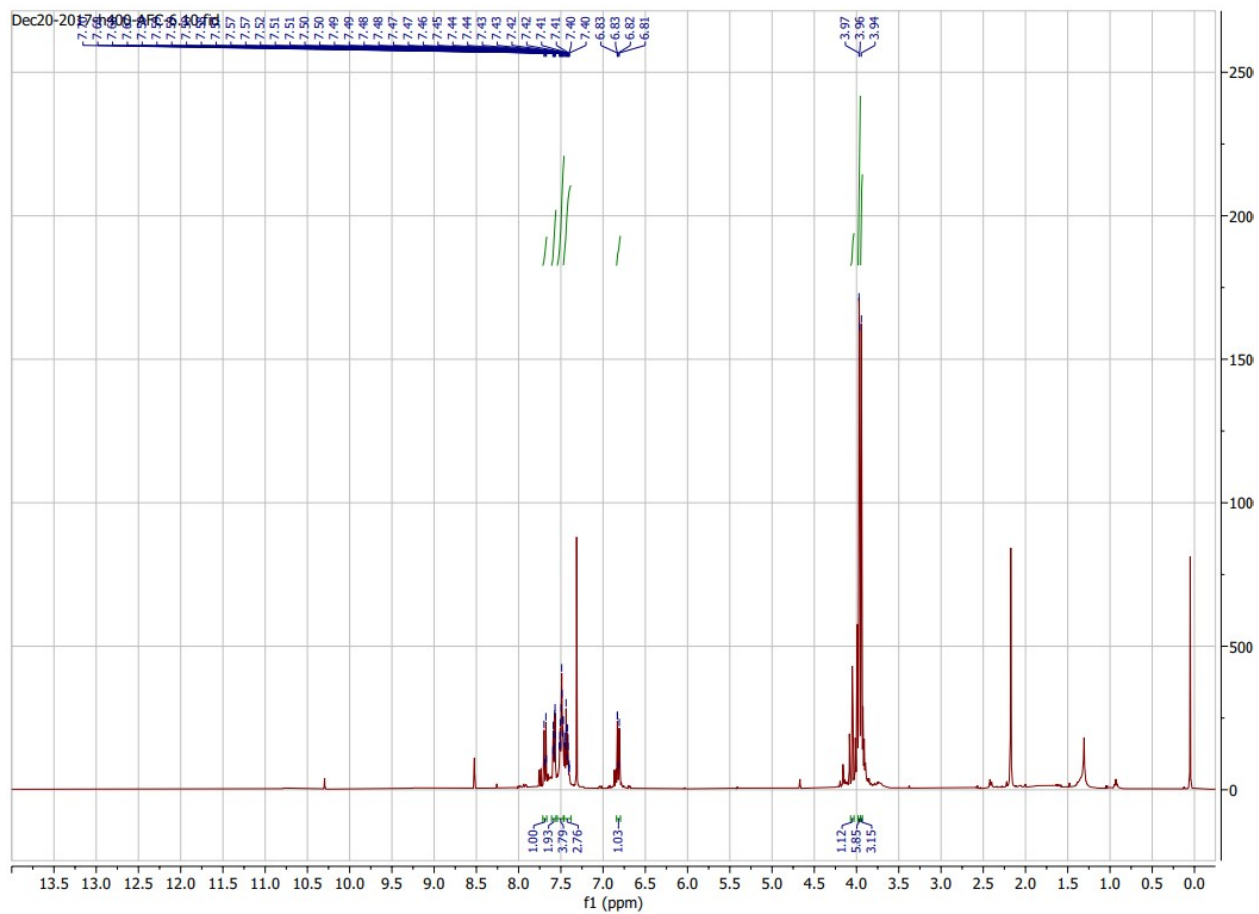

Figure-S10: <sup>1</sup>H NMR of Compound 10

Dr. Momin / / DMSO  
C13CPD

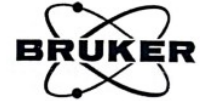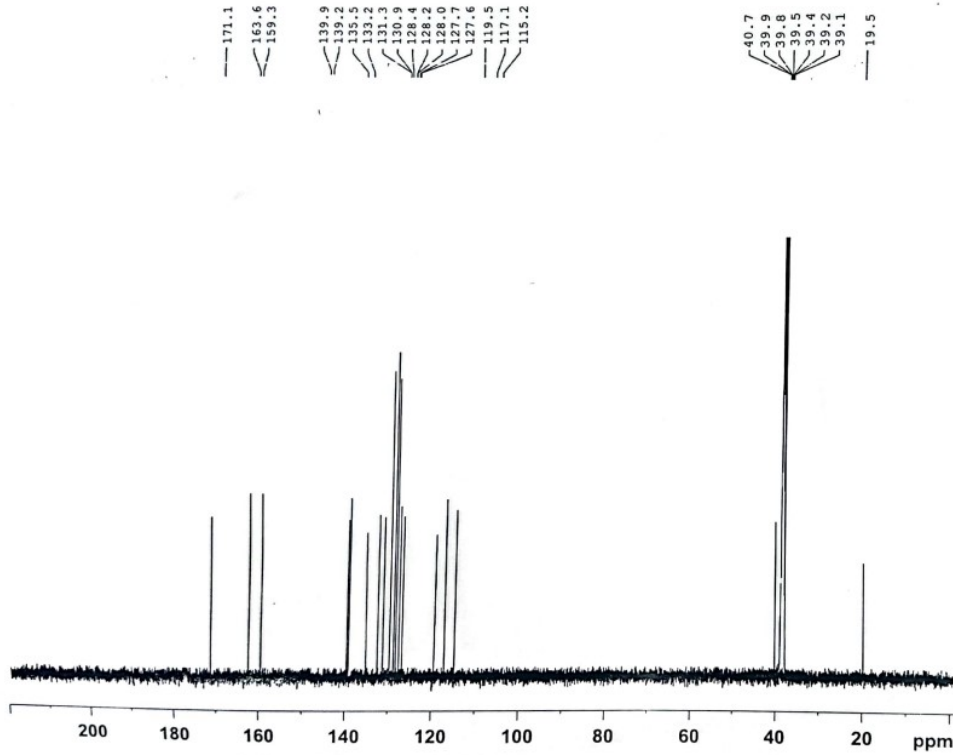

Current Data Parameters  
NAME 17-July-2023 Dr. Momin  
EXPNO 6  
PROCNO 1

Date\_ 20220717  
Time 1.03  
INSTRUM spect  
PROBHD 5 mm PABBO BB/  
PULPROG zgpg30  
TD 32768  
SOLVENT DMSO  
NS 1024  
DS 4  
SWH 36057.691 Hz  
FIDRES 1.100393 Hz  
AQ 0.4543829 sec  
RG 195.2  
DW 13.867 usec  
DE 6.50 usec  
TE 298.2 K  
D1 2.00000000 sec  
D11 0.03000000 sec  
TDO 1

F2 - Acquisition Parameters

----- CHANNEL f1 -----  
SFO1 150.9229276 MHz  
NUC1 13C  
P1 11.60 usec  
PLW1 83.00000000 W

----- CHANNEL f2 -----  
SFO2 600.1524006 MHz  
NUC2 1H  
CPDPRG2 waltz16  
PCPD2 70.00 usec  
PLW2 22.60000038 W  
PLW12 0.52806002 W  
PLW13 0.25874999 W

F2 - Processing parameters  
SI 32768  
SF 150.9079041 MHz  
WDW EM  
SSB 0  
LB 1.00 Hz  
GB 0  
PC 1.40

Figure-S11: <sup>13</sup>CNMR of Compound 11

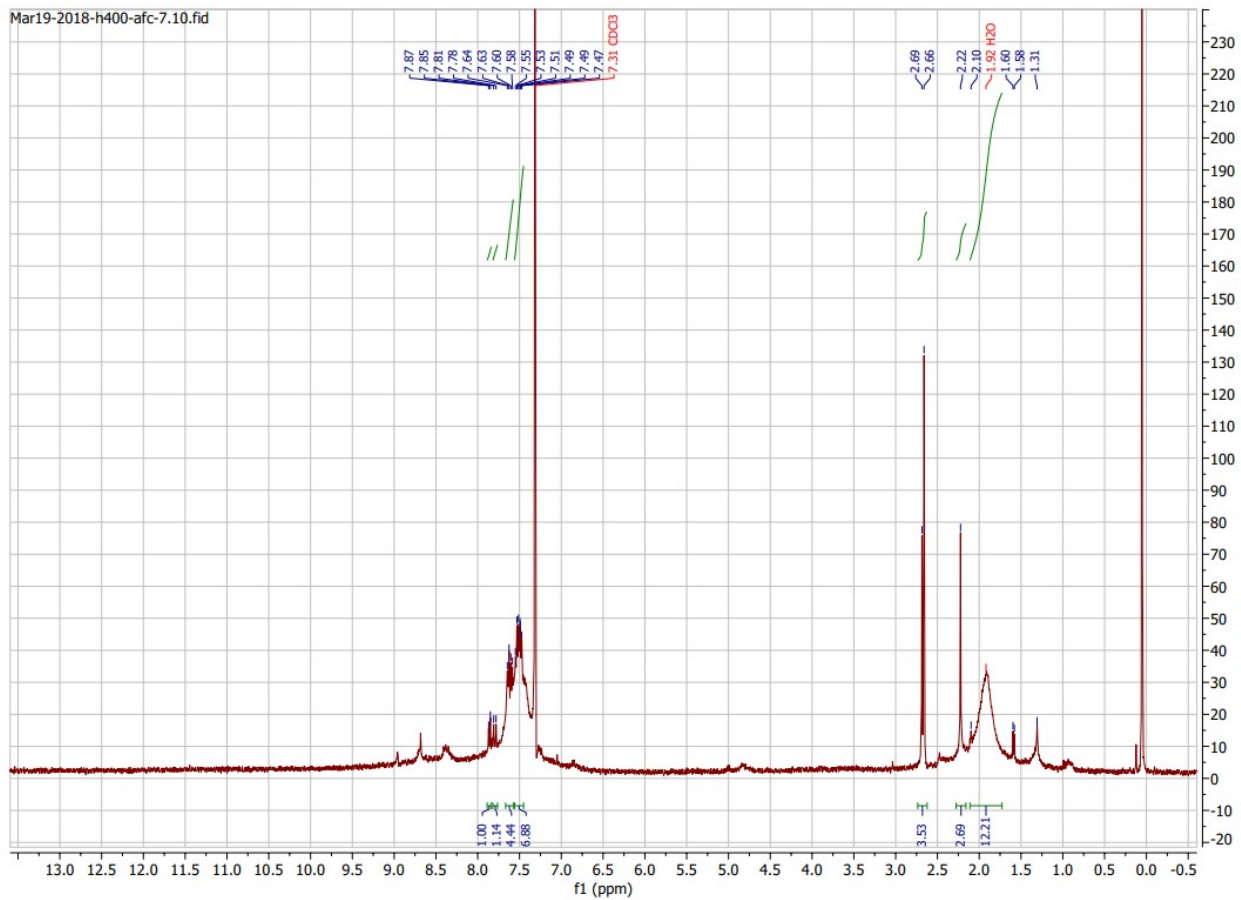

Figure-S12: <sup>1</sup>H NMR of Compound 11

Dr. Momin / / DMSO  
C13CPD

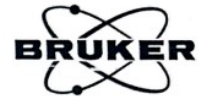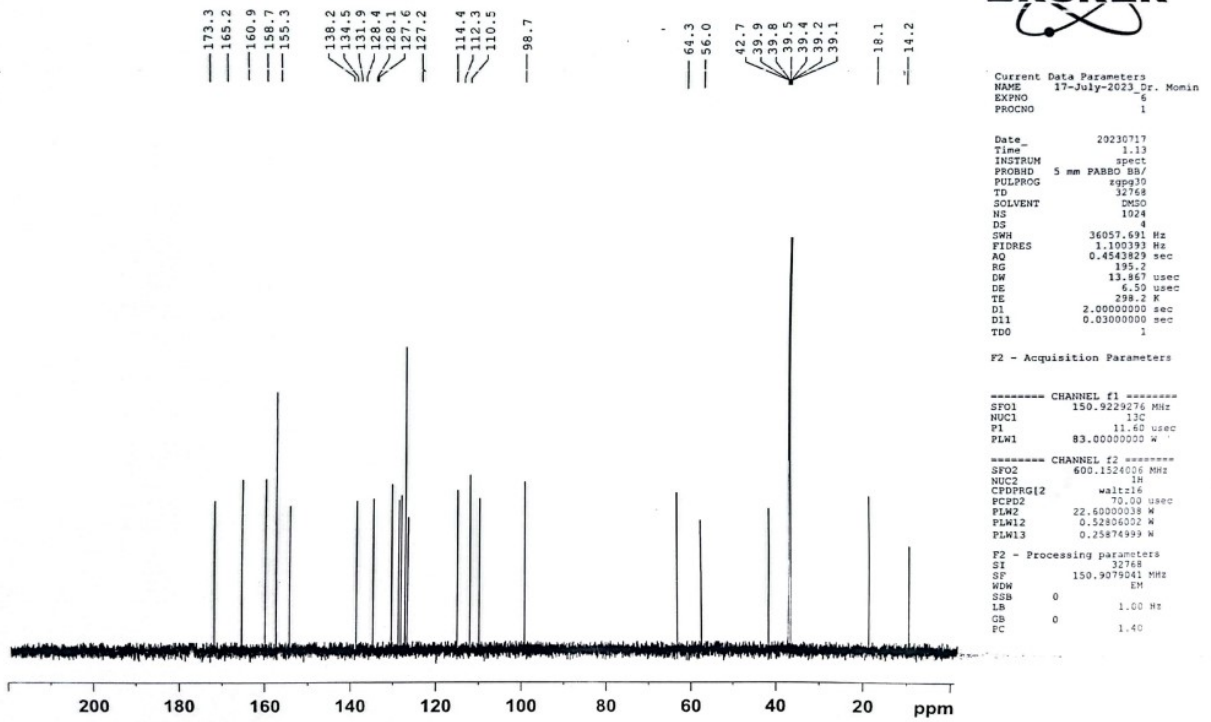

Figure-S13: <sup>13</sup>CNMR of Compound 12

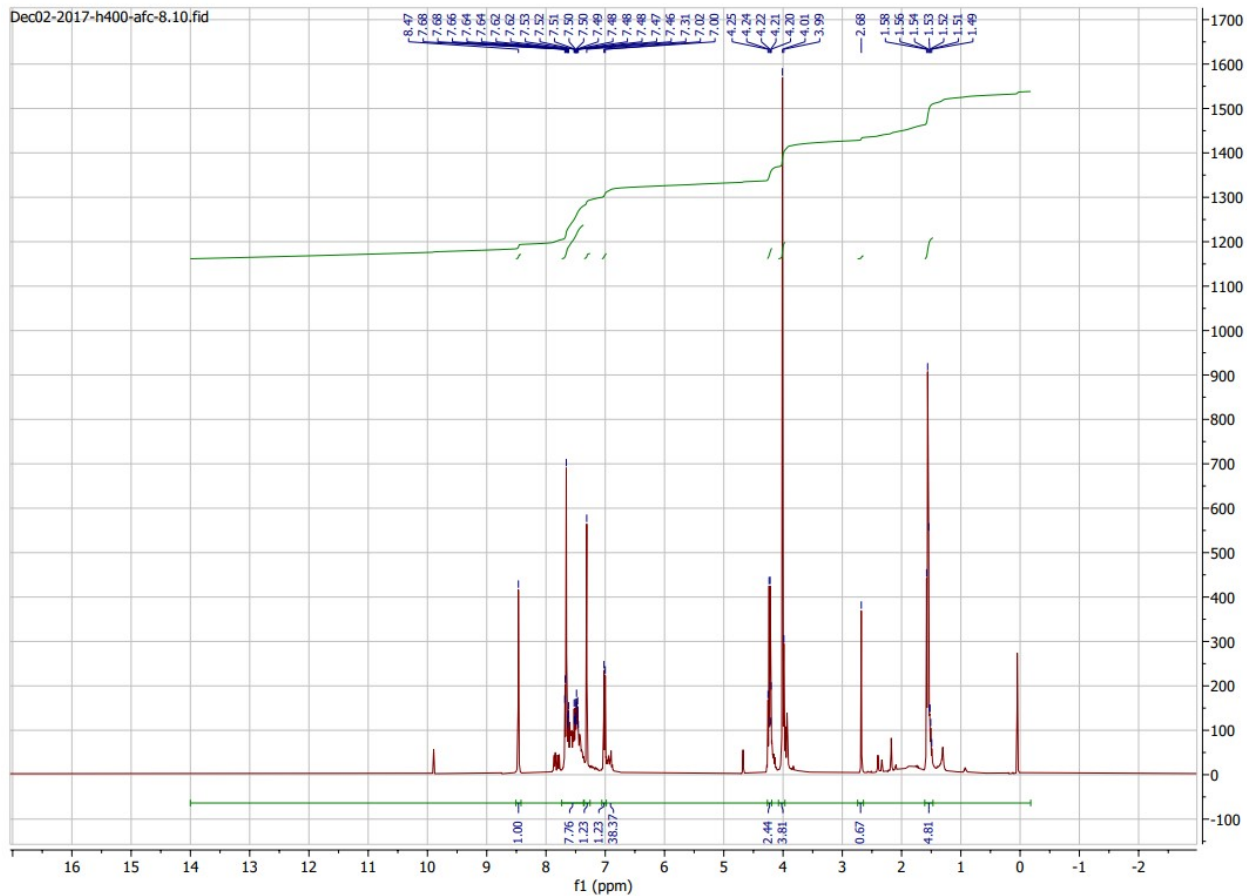

Figure-S14: <sup>1</sup>H NMR of Compound 12

Dr. Momin / / DMSO  
C13CPD

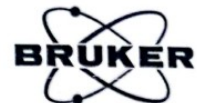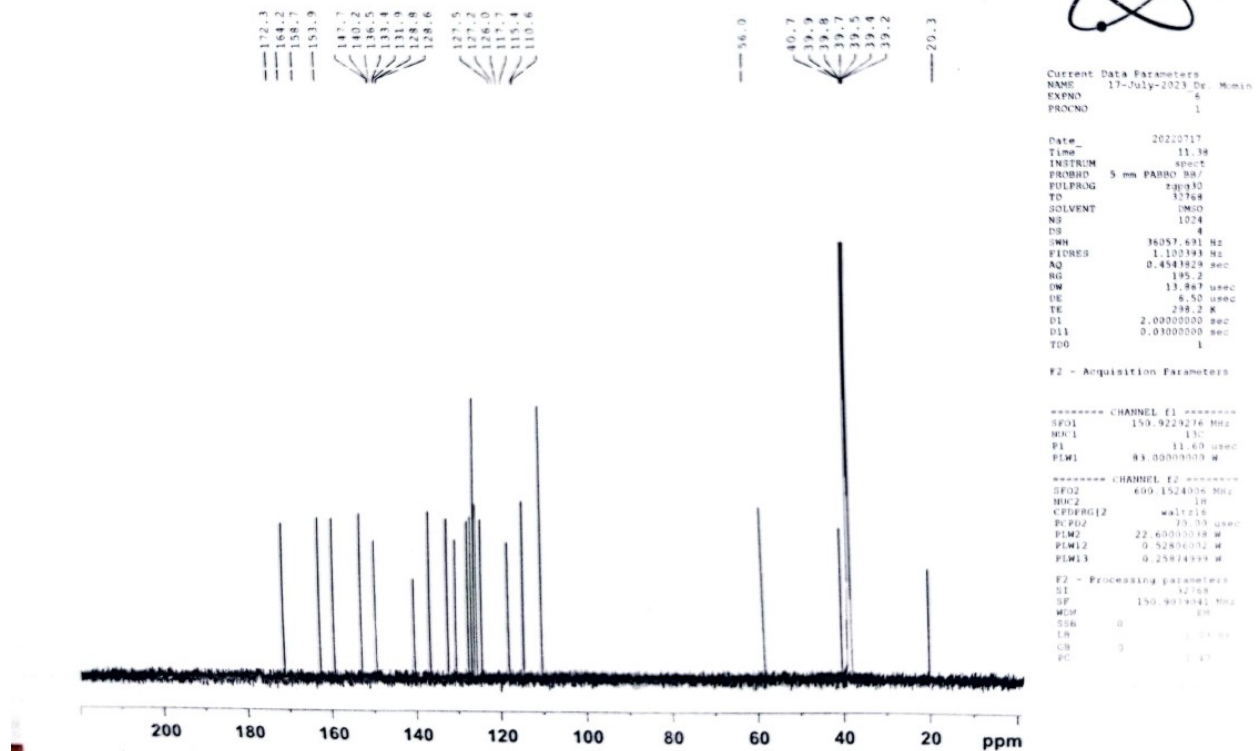

Figure-S15: <sup>13</sup>CNMR of Compound 13

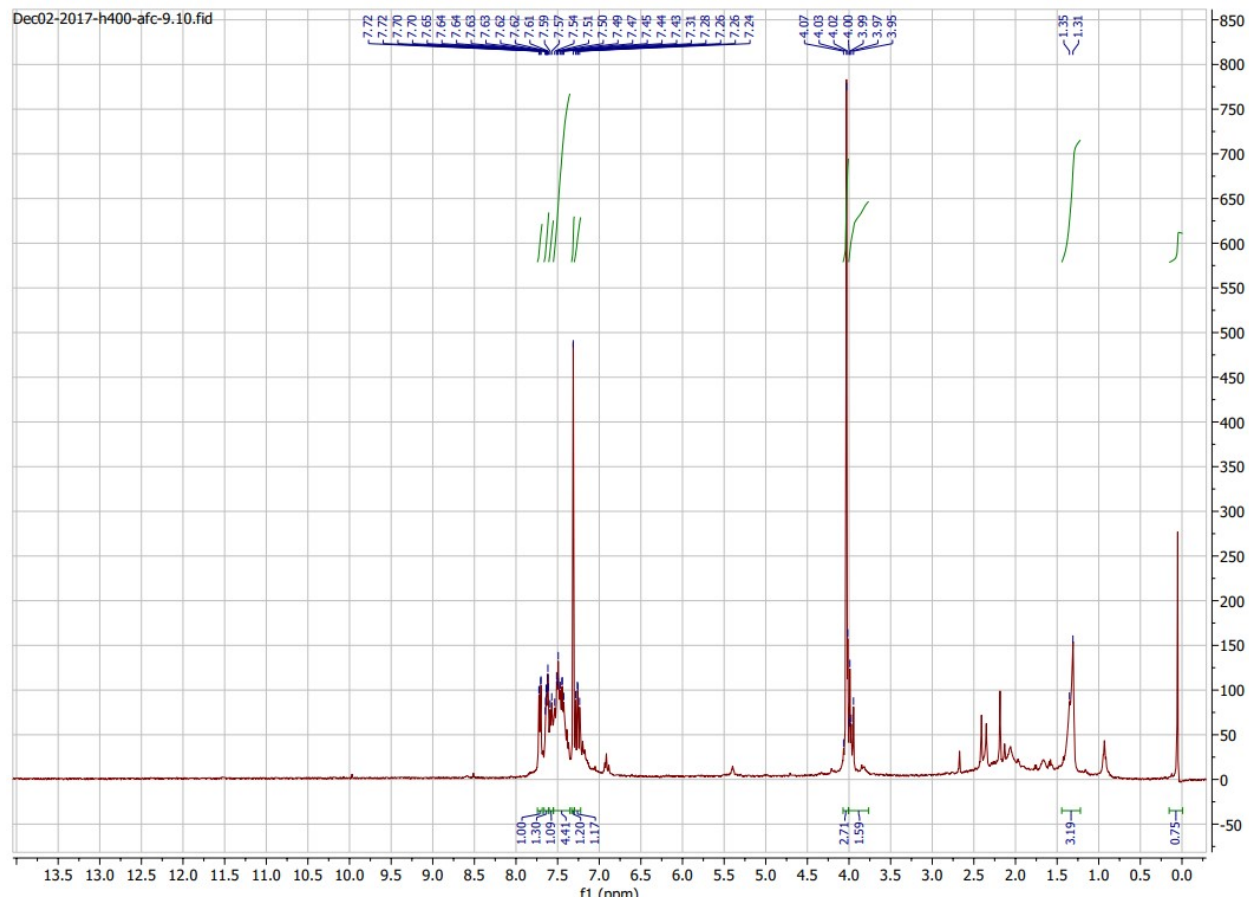

Figure-S16: <sup>1</sup>H NMR of Compound 13



Dr. Momin / / DMSO  
C13CPD

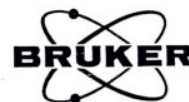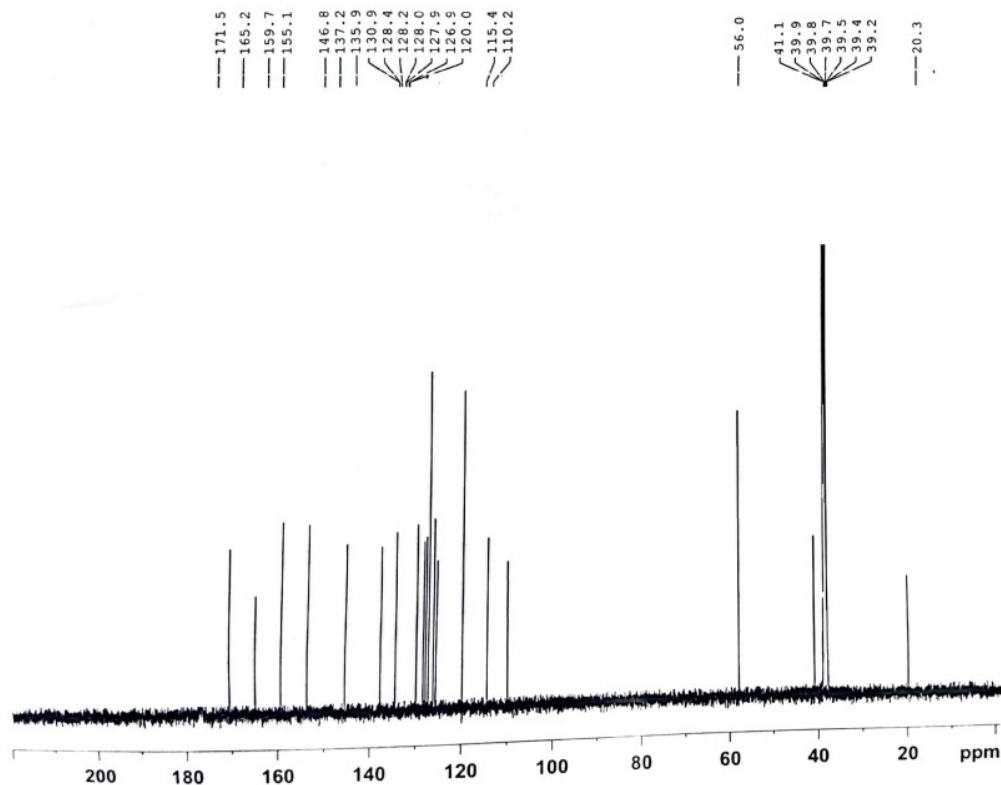

Current Data Parameters  
NAME 27-MaJuly-2023\_Dr. M  
EXPNO 6  
PROCNO 1

Date 20230717  
Time 11.21  
INSTRUM spect  
PROBHD 5 mm PABBO BB/  
F1PR0G zgpg30  
TD 32768  
SOLVENT DMSO  
NS 1024  
DS 4  
SWH 36057.691 Hz  
FIDRES 1.100393 Hz  
AQ 0.4543829 sec  
RG 195.2  
RW 13.867 usec  
DE 6.50 usec  
TE 298.2 K  
D1 2.00000000 sec  
D11 0.03000000 sec  
TD0 1

F2 - Acquisition Parameters

----- CHANNEL f1 -----  
SFO1 150.9229276 MHz  
NUC1 13C  
P1 11.60 usec  
PLW1 83.00000000 W

----- CHANNEL f2 -----  
SFO2 600.1524006 MHz  
NUC2 1H  
CPCPRG12 waltz16  
PCPD2 70.00 usec  
PLW2 22.60000038 W  
PLW12 0.52806002 W  
PLW13 0.25874999 W

F2 - Processing parameters  
SI 32768  
SF 150.9079041 MHz  
WDW EM  
SSB 0  
LB 1.00 Hz  
GB 0  
PC 1.40

Figure-S17: <sup>13</sup>CNMR of Compound 17

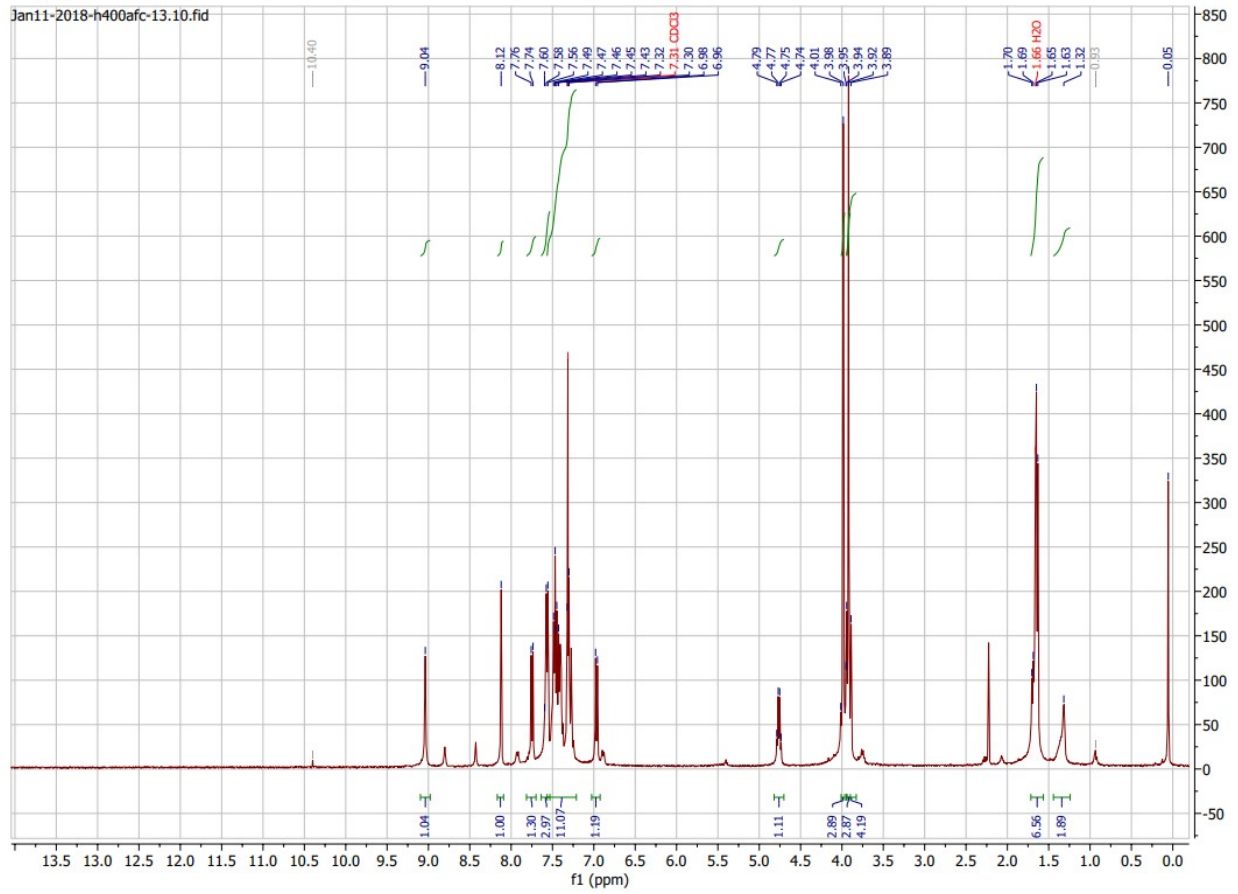

Figure-S18: <sup>1</sup>H NMR of Compound 17

Dr. Momin / / DMSO  
C13CPD

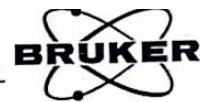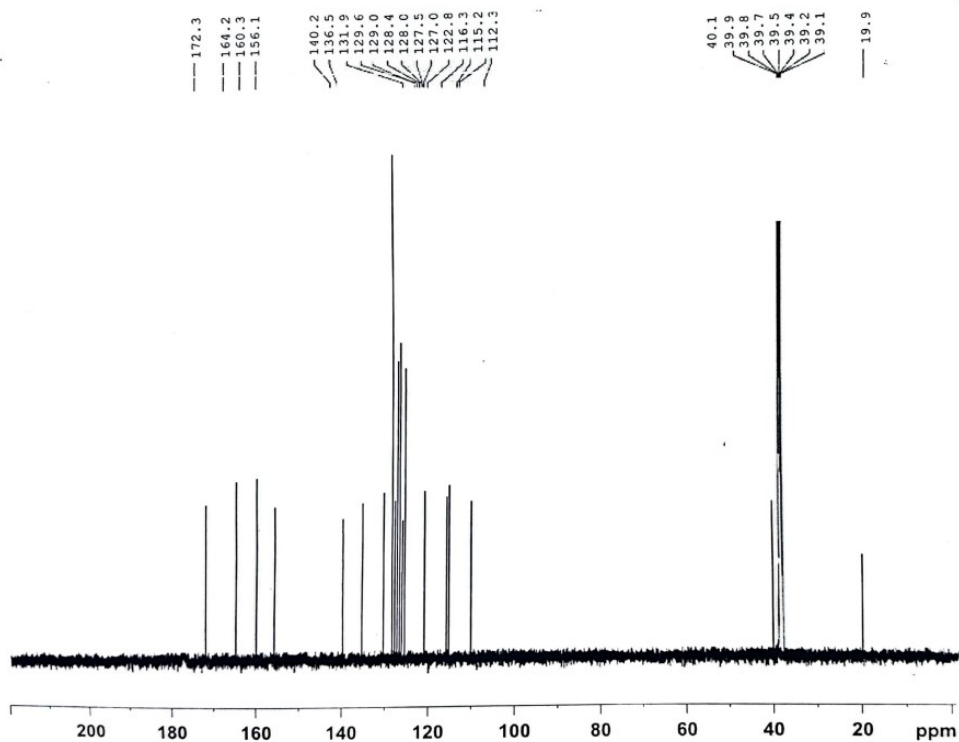

Current Data Parameters  
NAME 17-July-2023\_Dr. Momin  
EXPNO 6  
PROCNO 1

Date\_ 20230717  
Time 2.25  
INSTRUM spect  
PROBHD 5 mm PABBO BB/  
PULPROG zgpg30  
TD 32768  
SOLVENT DMSO  
NS 1024  
DS 4  
SWH 36057.691 Hz  
FIDRES 1.100393 Hz  
AQ 0.4543829 sec  
RG 195.2  
DW 13.957 usec  
DE 6.50 usec  
TE 298.2 K  
D1 2.0000000 sec  
D11 0.0300000 sec  
TDO 1

F2 - Acquisition Parameters

----- CHANNEL f1 -----  
SFO1 150.9229276 MHz  
NUC1 13C  
P1 11.60 usec  
PLW1 83.0000000 W

----- CHANNEL f2 -----  
SFO2 600.1524006 MHz  
NUC2 1H  
CPDPRG12 waltz16  
PCPD2 70.00 usec  
PLW2 22.60000038 W  
PLW12 0.52806002 W  
PLW13 0.25874999 W

F2 - Processing parameters  
SI 32768  
SF 150.9079041 MHz  
WDW EM  
SSB 0  
LB 1.00 Hz  
GB 0  
PC 1.40

Figure-S19: <sup>13</sup>CNMR of Compound 18

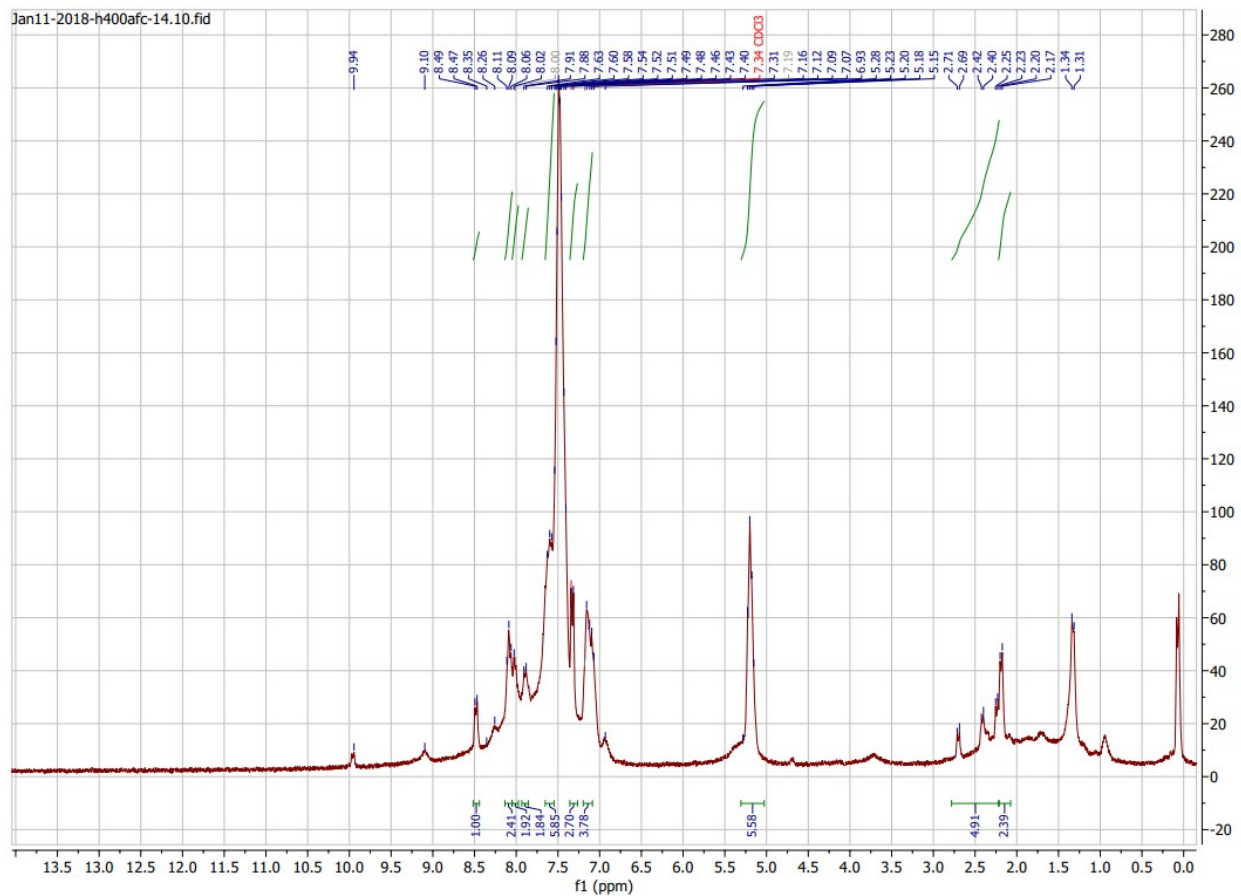

Figure-S20:  $^1\text{H}$ NMR of Compound 18

Dr. Momin / / DMSO  
C13CPD

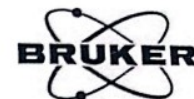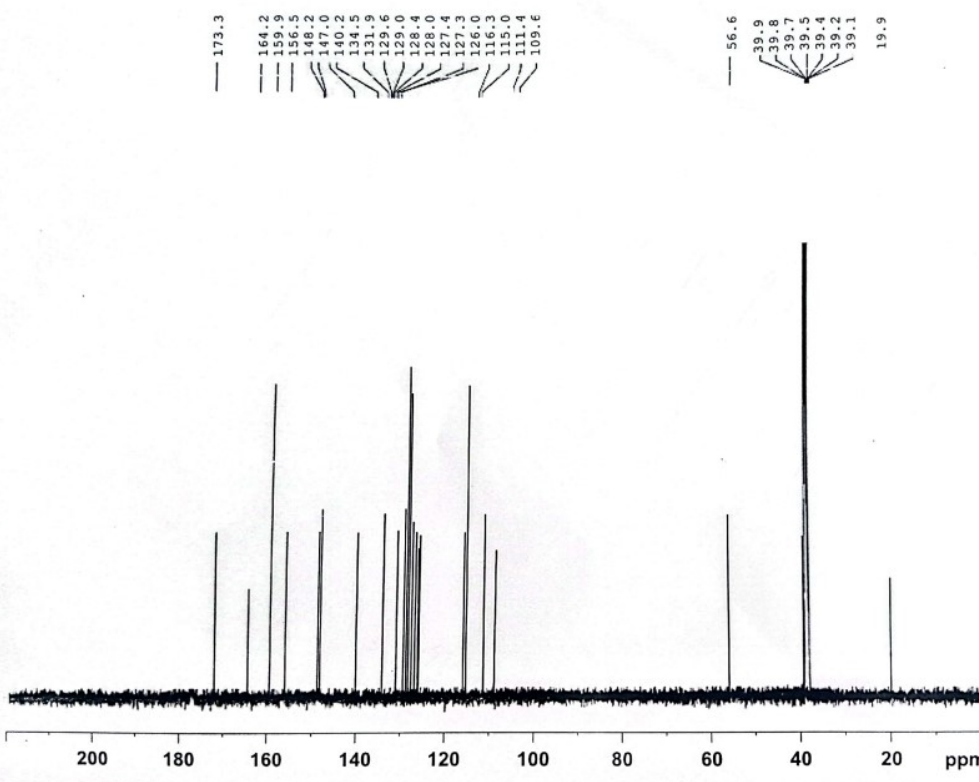

173.3  
164.2  
159.9  
156.5  
149.2  
140.2  
134.5  
131.9  
129.6  
129.0  
128.4  
128.0  
127.4  
127.3  
126.0  
116.3  
115.0  
111.4  
109.6

56.6  
39.9  
39.8  
39.7  
39.6  
39.5  
39.4  
39.3  
39.2  
39.1  
19.9

Current Data Parameters  
NAME 17-July-2023\_Dr. Momin  
EXPNO 6  
PROCNO 1

Date\_ 20230717  
Time\_ 1.45  
INSTRUM spect  
PROBHD 5 mm PABBO BB  
PULPROG zgpg30  
TD 32768  
SOLVENT DMSO  
NS 1024  
DS 4  
SWH 36957.691 Hz  
FIDRES 1.100393 Hz  
AQ 0.4543829 sec  
RG 195.2  
DW 13.867 usec  
DE 6.50 usec  
TE 298.2 K  
D1 2.00000000 sec  
D11 0.03000000 sec  
TD0 1

F2 - Acquisition Parameters

===== CHANNEL f1 =====  
SFO1 150.9229276 MHz  
NUC1 13C  
P1 11.60 usec  
PLW1 83.00000000 W

===== CHANNEL f2 =====  
SFO2 600.1524006 MHz  
NUC2 1H  
CPOPRG[2] waltz16  
PCPD2 70.00 usec  
PLW2 22.60000038 W  
PLW12 0.52866003 W  
PLW13 0.25874999 W

F2 - Processing parameters  
SI 32768  
SF 150.9079041 MHz  
WDW EM  
SSB 0  
LB 1.00 Hz  
GB 0  
PC 1.40

Figure-S21: <sup>13</sup>CNMR of Compound 19

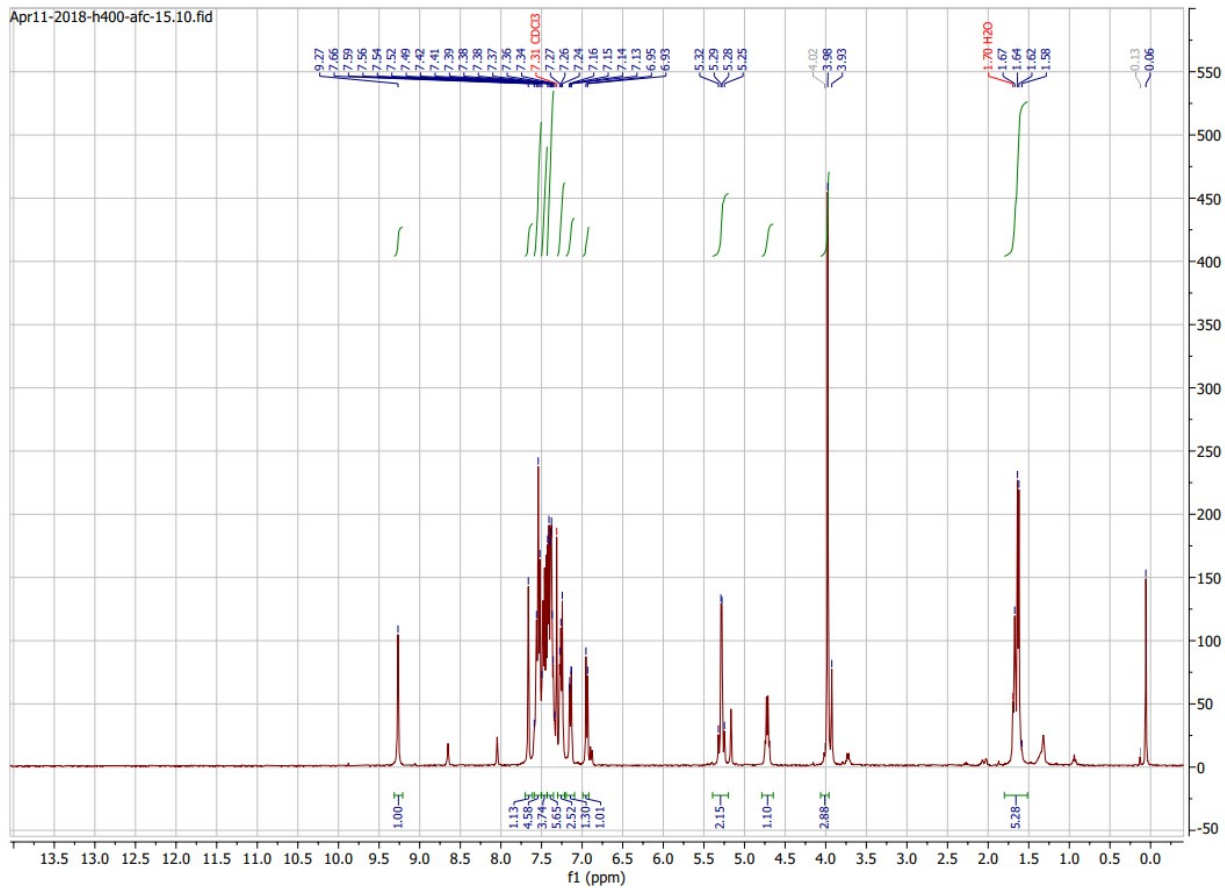

Figure-S22: <sup>1</sup>HNMR of Compound 19

Dr. Momin / / DMSO  
C13CPD

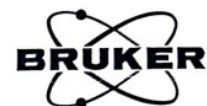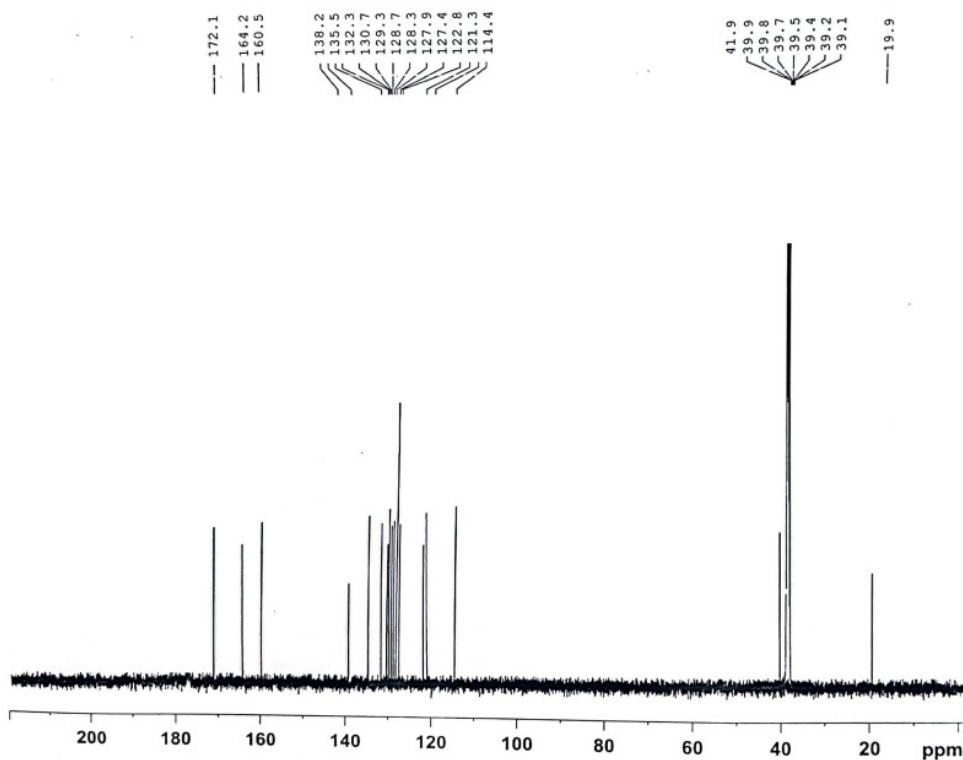

Current Data Parameters  
NAME 17-July-2023\_Dr. Momin  
EXPNO 6  
PROCNO 1

Date\_ 20230717  
Time 2.12  
INSTRUM spect  
PROBHD 5 mm PABBO BB/  
PULPROG zgpg30  
TD 32768  
SOLVENT DMSO  
NS 1024  
DS 4  
SWH 36057.691 Hz  
FIDRES 1.100393 Hz  
AQ 0.4543829 sec  
RG 195.2  
DW 13.867 usec  
DE 6.50 usec  
TE 298.2 K  
D1 2.00000000 sec  
D11 0.03000000 sec  
TD0 1

F2 - Acquisition Parameters

===== CHANNEL f1 =====  
SFO1 150.9229276 MHz  
NUC1 13C  
P1 11.60 usec  
PLW1 83.00000000 W

===== CHANNEL f2 =====  
SFO2 600.1524006 MHz  
NUC2 1H  
CPDPRG[2] waltz16  
PCPD2 70.00 usec  
PLW2 22.60000038 W  
PLW12 0.52806002 W  
PLW13 0.25874999 W

F2 - Processing parameters  
SI 32768  
SF 150.9079041 MHz  
WDW EM  
SSB 0  
LB 1.00 Hz  
GB 0  
PC 1.40

Figure-S23: <sup>13</sup>CNMR of Compound 21

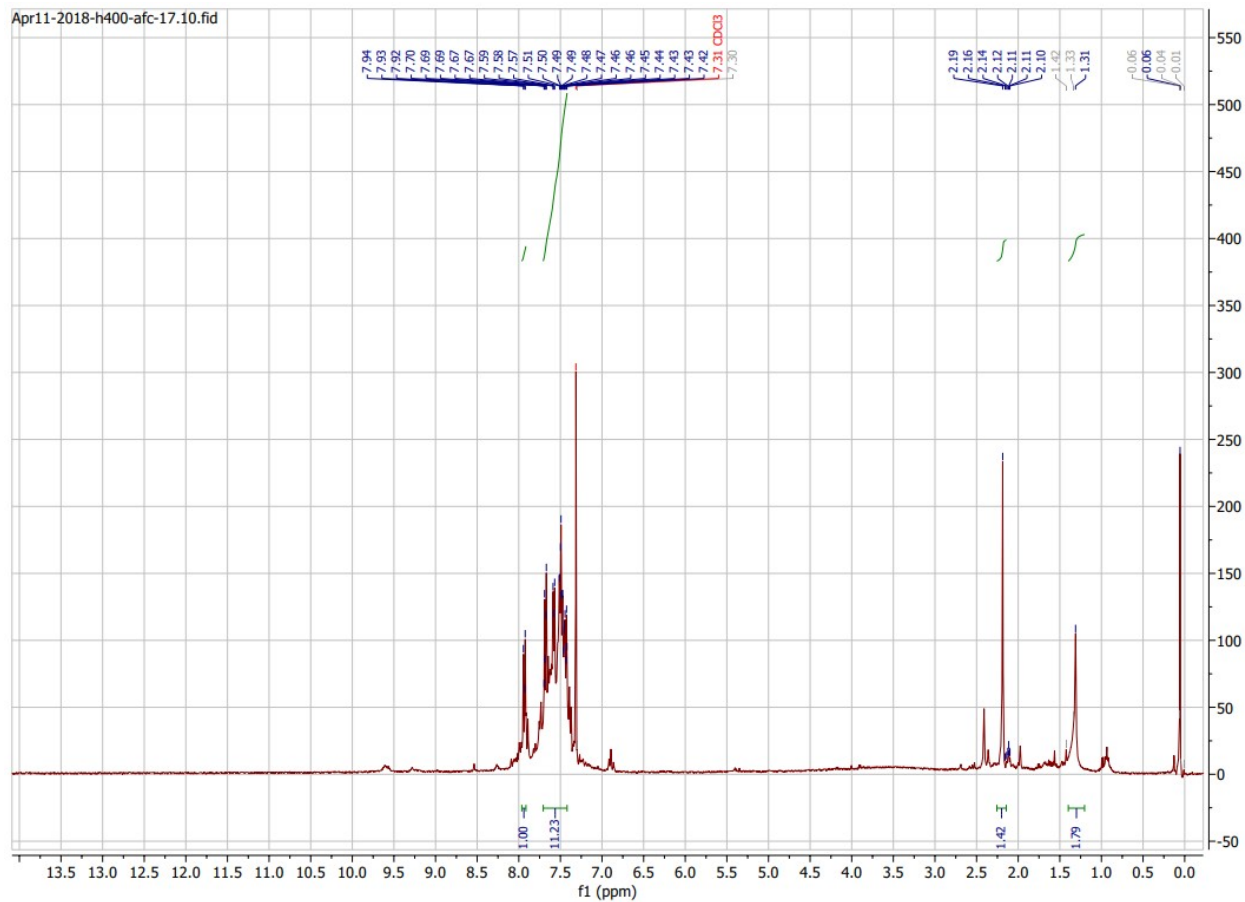

Figure-S24: <sup>1</sup>H NMR of Compound 21



Dr. Momin / / DMSO  
C13CPD

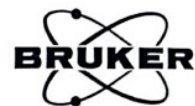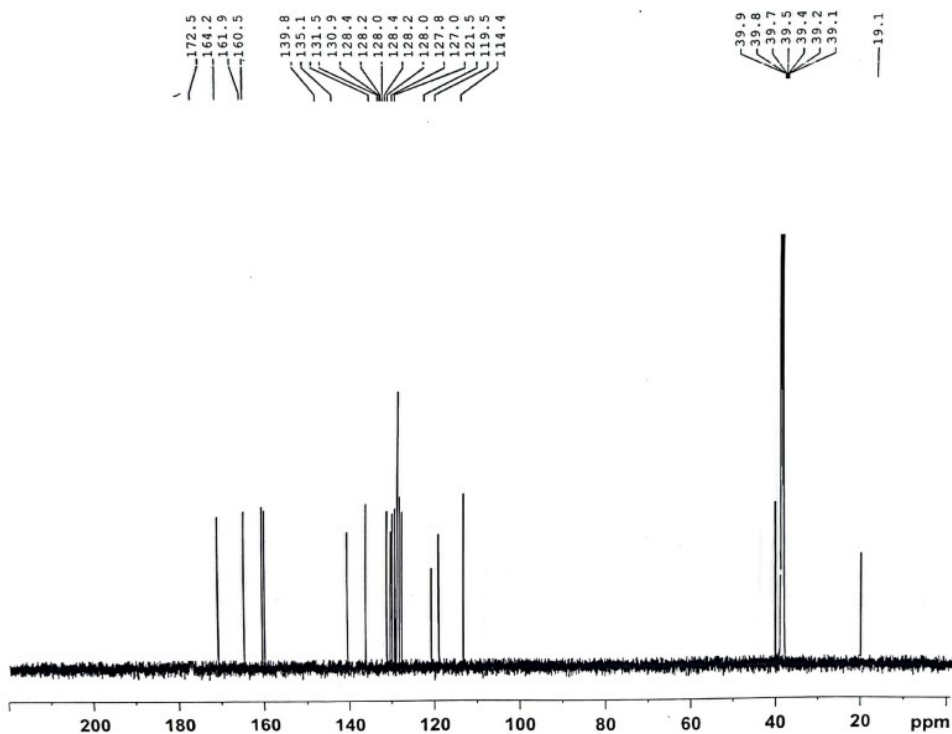

Current Data Parameters  
NAME 22-Mar-2018\_Dr. Momin  
Date 20230717  
Time 1.59  
INSTRUM spect  
PROBHD 5 mm PABBO BB/  
PULPROG zgpg30  
TD 32768  
SOLVENT DMSO  
NS 1024  
DS 4  
SWH 36057.691 Hz  
FIDRES 1.100393 Hz  
AQ 0.4543829 sec  
RG 195.2  
DW 13.867 usec  
DE 6.50 usec  
TE 298.2 K  
D1 2.0000000 sec  
D11 0.0300000 sec  
TDO 1  
F2 - Acquisition Parameters  
  
===== CHANNEL f1 =====  
SFO1 150.9229276 MHz  
NUC1 13C  
P1 11.60 usec  
PLW1 83.0000000 W  
  
===== CHANNEL f2 =====  
SFO2 600.1524006 MHz  
NUC2 1H  
CPOPRG[2] waltz16  
PCPD2 70.00 usec  
PLW2 22.6000000 W  
PLW12 0.52806002 W  
PLW13 0.25874999 W  
  
F2 - Processing parameters  
SI 32768  
SF 150.9079041 MHz  
WDW EM  
SSB 0  
LB 1.00 Hz  
GB 0  
PC 1.40

Figure-S25: <sup>13</sup>CNMR of Compound 24

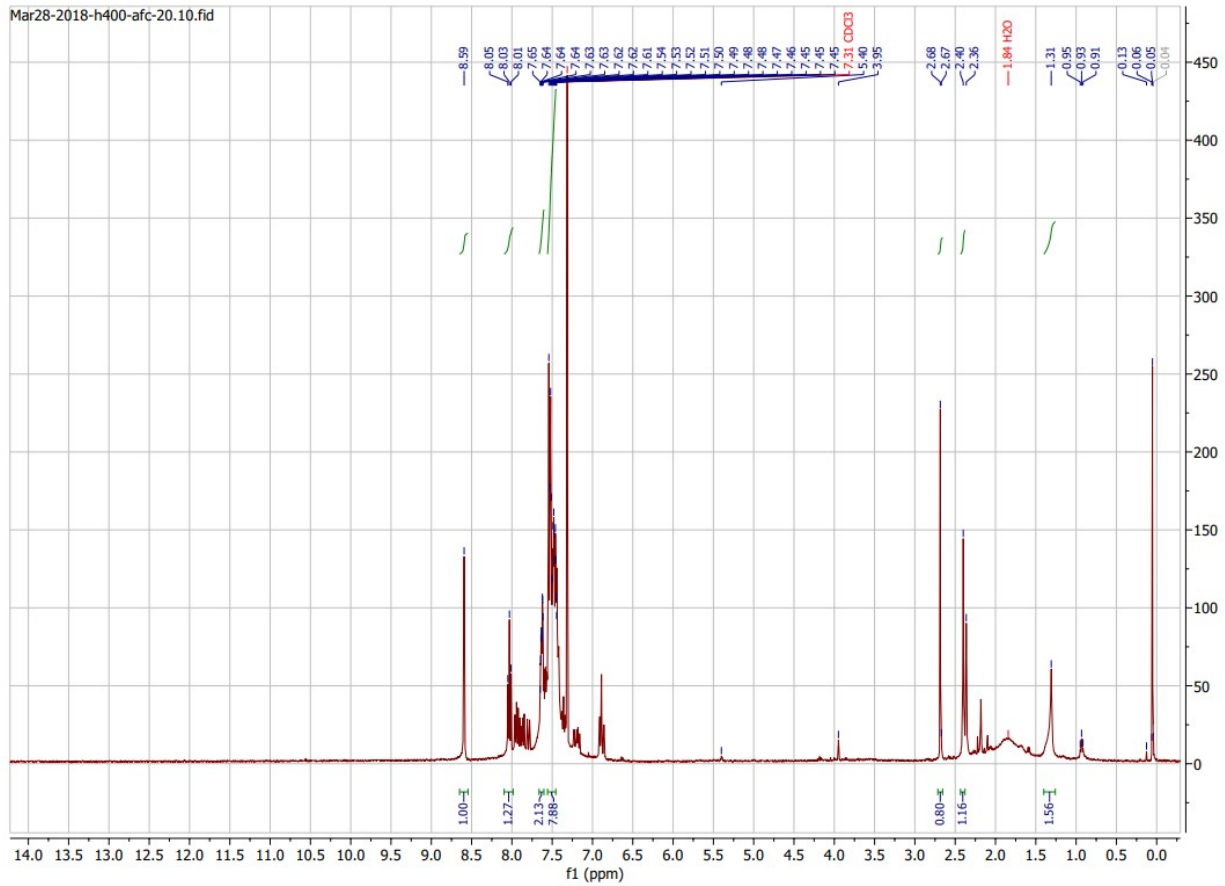

Figure-S26: <sup>1</sup>H NMR of Compound 24

Dr. Momin / / DMSO  
C13CPD

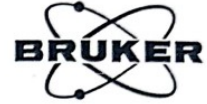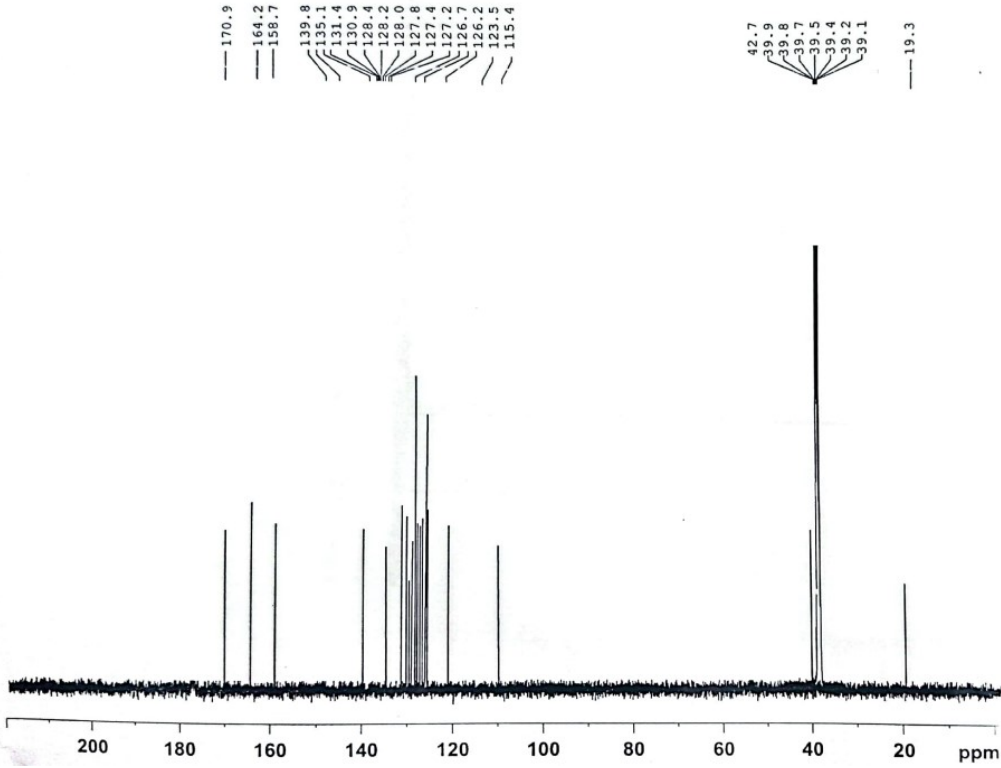

---170.9  
---164.2  
---158.7  
139.8  
135.1  
131.4  
130.9  
128.4  
128.2  
128.0  
127.8  
127.4  
127.2  
126.7  
126.2  
123.5  
115.4

42.7  
39.8  
39.7  
39.5  
39.4  
39.2  
39.1

---19.3

Current Data Parameters  
NAME 17-July-2023\_Dr. Momin  
Date\_ 20230717  
Time\_ 1.45  
INSTRUM spect  
PROBHD 5 mm PABBO BB/  
PULPROG zgpg30  
TD 32768  
SOLVENT DMSO  
NS 1024  
DS 4  
SWH 36057.691 Hz  
FIDRES 1.100393 Hz  
AQ 0.4543829 sec  
RG 195.2  
DW 13.867 usec  
DE 6.50 usec  
TE 298.2 K  
D1 2.0000000 sec  
D11 0.0300000 sec  
TD0 1  
F2 - Acquisition Parameters  
  
===== CHANNEL f1 =====  
SF01 150.9229276 MHz  
NUC1 13C  
P1 11.50 usec  
PLW1 83.00000000 W  
  
===== CHANNEL f2 =====  
SF02 600.1524006 MHz  
NUC2 1H  
CPCPRG[2] waltz16  
PCPD2 70.00 usec  
PLW2 22.60000038 W  
PLW12 0.52806002 W  
PLW13 0.25874999 W  
  
F2 - Processing parameters  
SI 32768  
SF 150.9079041 MHz  
WDW EM  
SSB 0  
LB 1.00 Hz  
GB 0  
PC 1.40

Figure-S27: <sup>13</sup>CNMR of Compound 26

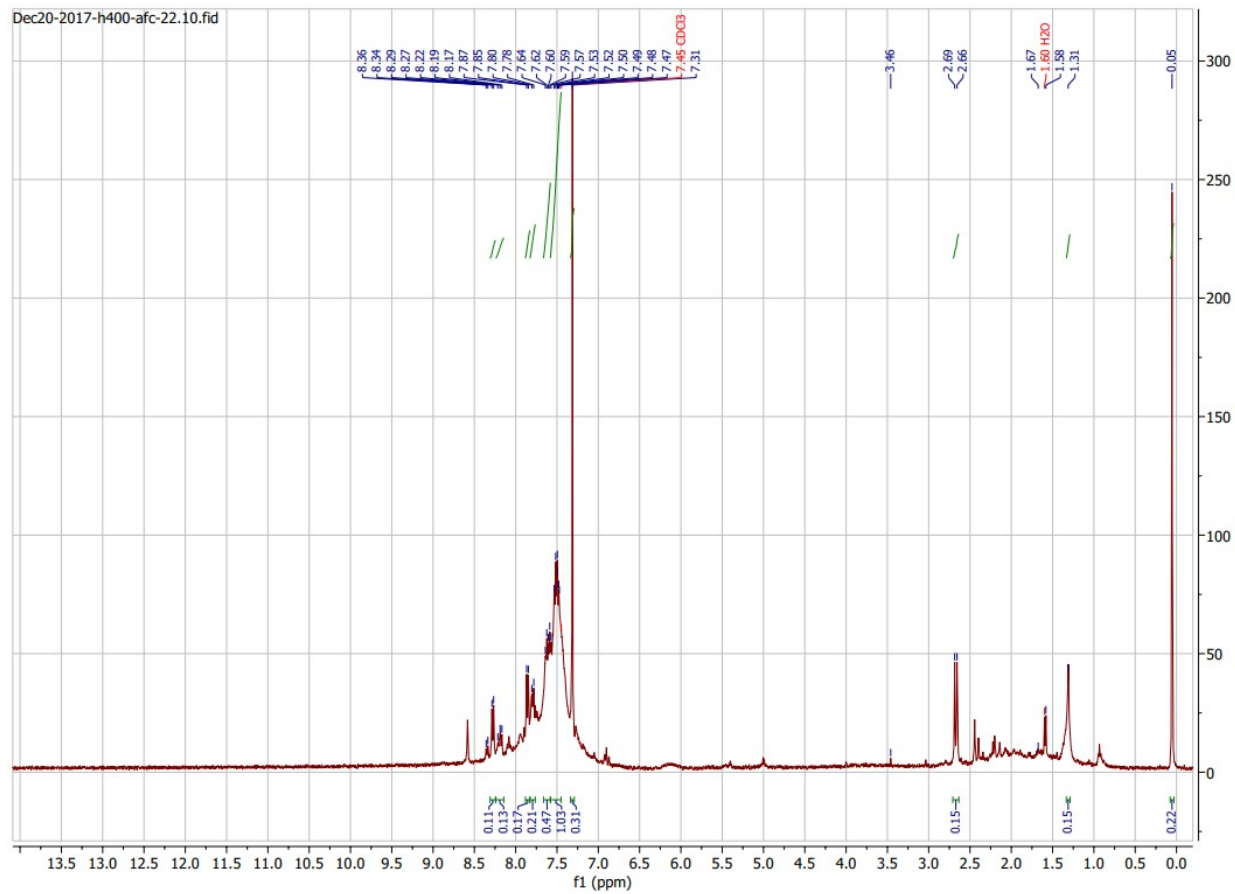

Figure-S28: <sup>1</sup>H NMR of Compound 26

Dr. Momin / / DMSO  
C13CPD

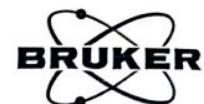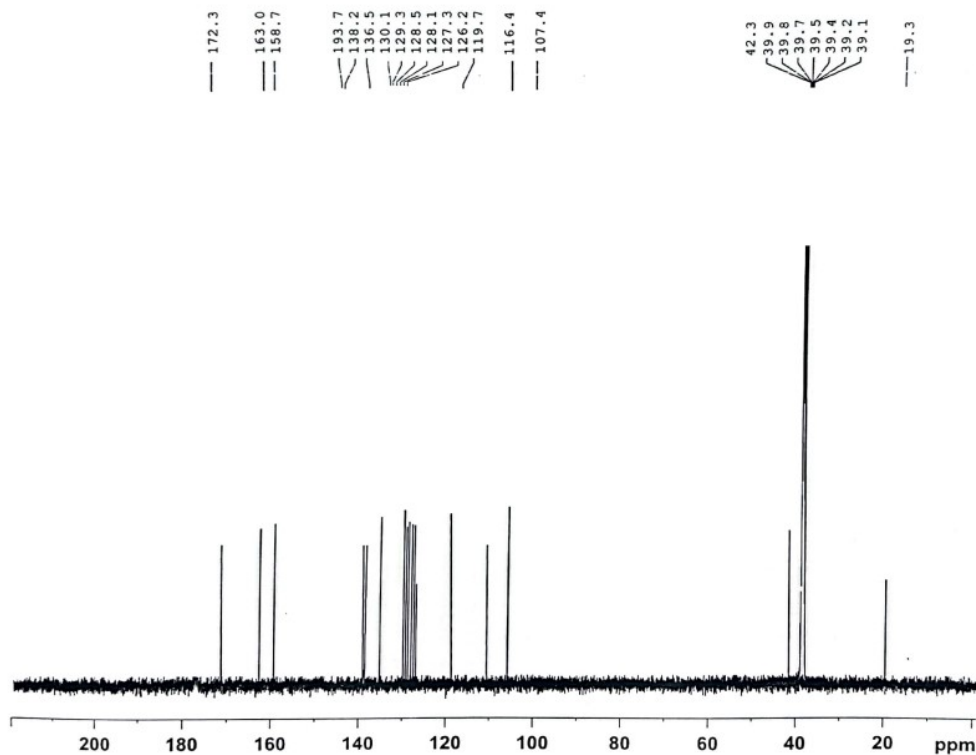

Current Data Parameters  
NAME 17-July-2023\_Dr. Momin  
Date 20230717  
Time 1.53  
INSTRUM spect  
PROBHD 5 mm PABBO BB/  
PULPROG zgpg30  
TD 32768  
SOLVENT DMSO  
NS 1024  
DS 4  
SWH 36057.691 Hz  
FIDRES 1.100393 Hz  
AQ 0.4543829 sec  
RG 195.2  
DW 13.867 usec  
DE 6.50 usec  
TE 298.2 K  
D1 2.00000000 sec  
D11 0.03000000 sec  
TDO 1

F2 - Acquisition Parameters

----- CHANNEL f1 -----  
SFO1 150.9229276 MHz  
NUC1 13C  
P1 11.60 usec  
PLW1 83.00000000 W

----- CHANNEL f2 -----  
SFO2 600.1524006 MHz  
NUC2 1H  
CHPRG2 waltz16  
ECPD2 70.00 usec  
PLW2 22.60000038 W  
PLW12 0.32806002 W  
PLW13 0.25874999 W

F2 - Processing parameters  
SI 32768  
SF 150.9079041 MHz  
WDW EM  
SSB 0  
LB 1.00 Hz  
GB 0  
PC 1.40

Figure-S29: <sup>13</sup>CNMR of Compound 32

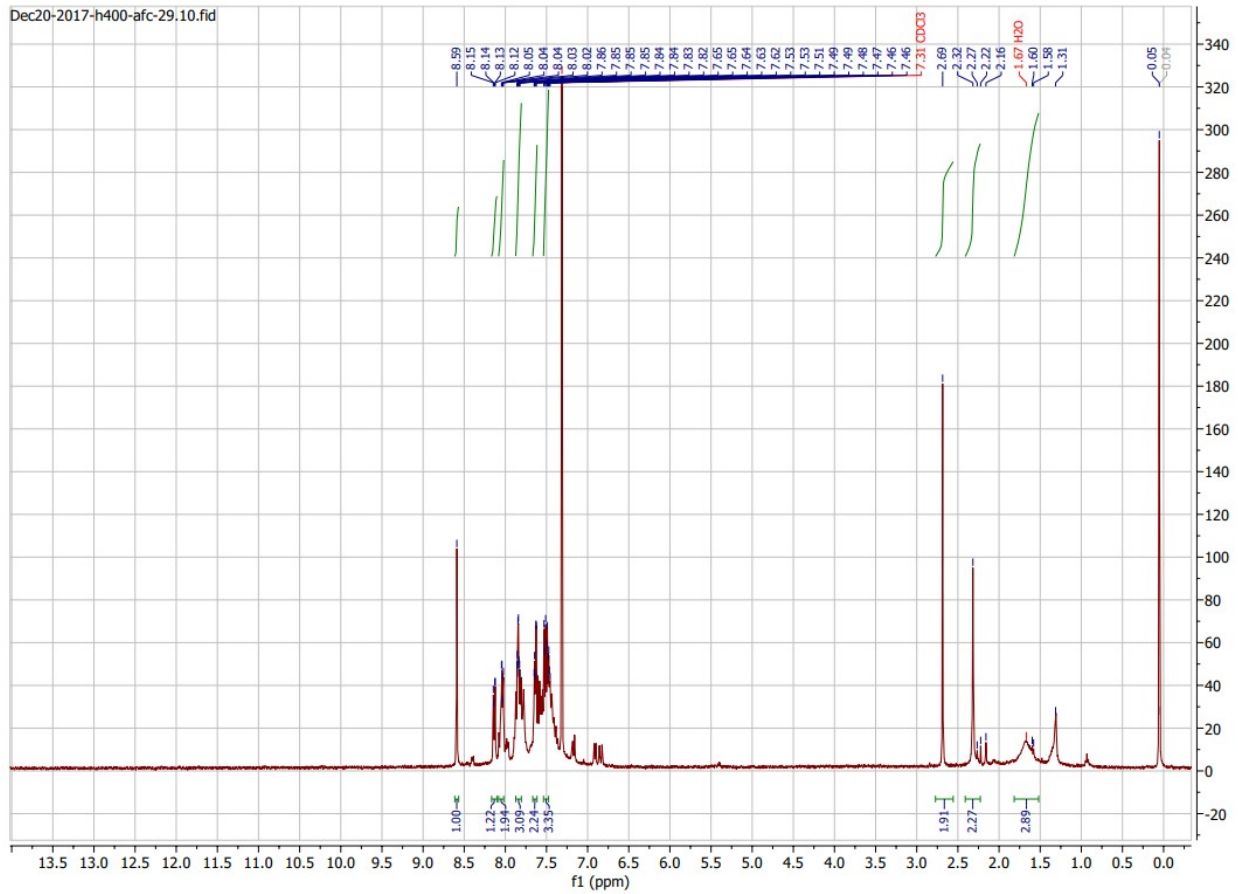

Figure-S30: <sup>1</sup>H NMR of Compound 32
